# Supplementary material
Source: PubMed Central journal article supplement (PMC8288377)
Supplement: NIHMS1716896-supplement-1.pdf [file NIHMS1716896-supplement-1.pdf]

## Supplemental material

**Supplemental Table 1** - Regressions of ad libitum snack intake from virtual portions<sup>1</sup>

|    |           |                 | Ad libitum snack intake |        |              |              |        |              |
|----|-----------|-----------------|-------------------------|--------|--------------|--------------|--------|--------------|
|    |           |                 | After rest              |        |              | After stress |        |              |
|    |           |                 | M&Ms                    | Oreos  | Potato chips | M&Ms         | Oreos  | Potato chips |
| 1  | Momentary | Potato chips    | -0.06                   | -0.12  | <b>0.55*</b> | -0.09        | -0.22  | 0.32         |
| 2  | rest      | Apples          | -0.18                   | -0.16  | 0.09         | -0.25        | -0.21  | -0.12        |
| 3  | portion   | Olives          | -0.03                   | -0.14  | 0.59*        | -0.06        | -0.11  | <b>0.62*</b> |
| 4  |           | Milk chocolate  | 0.38*                   | 0.27   | 0.28         | 0.49         | 0.27   | 0.15         |
| 5  |           | Pretzels        | 0.06                    | 0.13   | 0.30         | -0.05        | 0.07   | 0.13         |
| 6  |           | Caramel popcorn | 0.12                    | -0.02  | 0.35         | 0.09         | -0.05  | 0.26         |
| 7  | Momentary | Potato chips    | 0.08                    | -0.22  | 0.34         | 0.14         | -0.19  | 0.43*        |
| 8  | stress    | Apples          | 0.02                    | 0.11   | 0.04         | -0.06        | 0.18   | <0.01        |
| 9  | portion   | Olives          | 0.08                    | -0.11  | 0.50*        | 0.07         | -0.06  | 0.59*        |
| 10 |           | Milk chocolate  | 0.50*                   | 0.17   | 0.18         | <b>0.71*</b> | 0.24   | 0.33         |
| 11 |           | Pretzels        | 0.04                    | 0.19   | 0.33         | -0.12        | 0.16   | 0.32         |
| 12 |           | Caramel popcorn | 0.06                    | -0.04  | 0.30         | 0.11         | -0.02  | 0.44*        |
| 13 | Typical   | Potato chips    | -0.05                   | -0.47* | 0.39*        | -0.03        | -0.53* | 0.31         |
| 14 | portion   | Apples          | 0.02                    | -0.07  | <0.01        | -0.13        | <0.01  | -0.16        |
| 15 |           | Olives          | 0.02                    | -0.13  | <b>0.64*</b> | 0.04         | -0.13  | <b>0.70*</b> |
| 16 |           | Milk chocolate  | 0.14                    | 0.19   | 0.01         | 0.32         | 0.09   | -0.04        |
| 17 |           | Pretzels        | -0.06                   | 0.13   | 0.53*        | -0.05        | 0.11   | 0.49*        |
| 18 |           | Caramel popcorn | -0.08                   | 0.08   | 0.27         | -0.02        | -0.01  | 0.07         |
| 19 | Recalled  | Potato chips    | 0.14                    | -0.42* | 0.23         | 0.29         | -0.48* | 0.32         |
| 20 | stress    | Apples          | -0.09                   | -0.26  | 0.04         | -0.16        | -0.18  | -0.02        |
| 21 | portion   | Olives          | 0.13                    | -0.17  | 0.48*        | 0.27         | -0.16  | <b>0.65*</b> |
| 22 |           | Milk chocolate  | 0.23                    | -0.03  | 0.08         | 0.54*        | -0.03  | 0.22         |
| 23 |           | Pretzels        | 0.08                    | -0.25  | 0.09         | 0.14         | -0.16  | 0.15         |
| 24 |           | Caramel popcorn | 0.15                    | -0.12  | 0.22         | 0.32         | -0.16  | 0.25         |

<sup>1</sup> Table of compiled regression slopes for predictions of ad lib intake from virtual portions. Two sets of linear regression analyses were performed for convergent and divergent validity. For the convergent predictions that virtual portions will predict intakes of similar foods, under similar theoretical eating contexts (recalled stress and momentary stress with “after stress” intake, and typical and momentary rest with “after rest” intake), p-values were held to Bonferroni correction ( $k = 24$ ,  $P \leq 0.002$ ). For the divergent predictions that virtual portions will not predict intakes if there is a mismatch in theoretical eating contexts (recalled stress and momentary stress with “after rest” intake, and typical and momentary rest with “after stress” intake) and/or in food type, p-values were held to Bonferroni correction ( $k = 120$ ,  $P \leq 0.0004$ ). Coefficients significant after Bonferroni correction are **bolded**.  $N = 29$ .

\* Uncorrected  $P < 0.05$

**Supplemental Table 2** – Measures of central tendency and range for liking and frequency of snacks at screening<sup>1</sup>

|                    | Liking (0-100mm) |      |        |        |       | Frequency (0-3 times/day) |      |        |      |      | Frequency (0-21 times/week) |      |        |       |      |
|--------------------|------------------|------|--------|--------|-------|---------------------------|------|--------|------|------|-----------------------------|------|--------|-------|------|
|                    | Mean             | SEM  | Median | Max    | Min   | Mean                      | SEM  | Median | Max  | Min  | Mean                        | SEM  | Median | Max   | Min  |
| <b>Snack items</b> |                  |      |        |        |       |                           |      |        |      |      |                             |      |        |       |      |
| Potato chips       | 57.14            | 3.96 | 55.00  | 100.00 | 18.00 | 0.27                      | 0.08 | 0.13   | 2.00 | 0.00 | 1.89                        | 0.54 | 0.92   | 14.04 | 0.00 |
| Apple slices       | 72.62            | 2.99 | 72.00  | 100.00 | 50.00 | 0.39                      | 0.11 | 0.23   | 3.00 | 0.02 | 2.74                        | 0.74 | 1.62   | 21.06 | 0.12 |
| Olives             | 35.07            | 6.40 | 23.00  | 100.00 | 0.00  | 0.08                      | 0.04 | 0.00   | 1.00 | 0.00 | 0.53                        | 0.26 | 0.00   | 7.02  | 0.00 |
| Milk chocolate     | 62.03            | 3.30 | 65.00  | 99.00  | 21.00 | 0.11                      | 0.03 | 0.07   | 0.57 | 0.00 | 0.77                        | 0.20 | 0.46   | 4.02  | 0.00 |
| M&Ms               | 42.36            | 1.43 | 47.50  | 94.00  | 0.00  | 0.01                      | 0.00 | 0.00   | 0.13 | 0.00 | 0.05                        | 0.01 | 0.00   | 0.92  | 0.00 |
| Pretzels           | 56.48            | 3.40 | 55.00  | 91.00  | 0.00  | 0.08                      | 0.02 | 0.07   | 0.57 | 0.00 | 0.59                        | 0.14 | 0.46   | 4.02  | 0.00 |
| Caramel popcorn    | 57.97            | 3.87 | 57.00  | 86.00  | 0.00  | 0.03                      | 0.01 | 0.01   | 0.28 | 0.00 | 0.23                        | 0.08 | 0.06   | 2.00  | 0.00 |
| Golden Oreos       | 61.21            | 1.76 | 67.00  | 92.00  | 0.00  | 0.09                      | 0.01 | 0.07   | 0.28 | 0.00 | 0.64                        | 0.05 | 0.46   | 1.99  | 0.00 |

<sup>1</sup> Table of means, standard error of the mean (SEM), median as well as the maximum and minimum values for virtual liking (0-100mm VAS, collected at screening), and frequency expressed in times/day and times/week for all study participants ( $N = 29$ ).

**Supplemental Table 3** – Measures of central tendency and range for post-consumption liking<sup>1</sup>

| <b>Snack</b> |            | <b>Mean</b> | <b>SEM</b> | <b>Median</b> | <b>Max</b> | <b>Min</b> |
|--------------|------------|-------------|------------|---------------|------------|------------|
| M&Ms         | Stress     | 9.50        | 0.23       | 9.80          | 14.80      | 0.50       |
|              | Rest       | 9.42        | 0.20       | 9.30          | 13.50      | 0.70       |
|              | Difference | 0.08        | 0.12       | -0.20         | 4.90       | -2.80      |
| Potato chips | Stress     | 10.55       | 0.15       | 10.90         | 14.80      | 5.70       |
|              | Rest       | 10.57       | 0.15       | 11.00         | 15.00      | 6.30       |
|              | Difference | -0.02       | 0.09       | -0.10         | 2.60       | -2.60      |
| Oreos        | Stress     | 8.68        | 1.93       | 88.00         | 13.10      | 1.20       |
|              | Rest       | 8.83        | 1.81       | 86.00         | 13.10      | 0.60       |
|              | Difference | -0.15       | 1.37       | -4.00         | 5.40       | -3.80      |

<sup>1</sup> Table of means, standard error of the mean (SEM), median as well as the maximum and minimum values for post-consumption laboratory snack liking (0-15 ordinal scale) of each snack for all study participants ( $N = 29$ ).

**Supplemental Table 4** – Regressions of liking after eating from virtual liking<sup>1</sup>

|    | Snack | Condition | Dependent           | Parameter      | Value | SEM   | T    | R <sup>2</sup> | P                 |
|----|-------|-----------|---------------------|----------------|-------|-------|------|----------------|-------------------|
| 1  | M&Ms  | Stress    | Liking after eating | Intercept      | 60.78 | 12.92 | 4.70 | 0.23           | <0.0001           |
| 2  |       |           |                     | Virtual liking | 0.78  | 0.28  | 2.78 |                | 0.01              |
| 3  |       | Rest      | Liking after eating | Intercept      | 59.77 | 10.31 | 5.80 | 0.32           | <0.0001           |
| 4  |       |           |                     | Virtual liking | 0.78  | 0.22  | 3.49 |                | <b>0.002</b>      |
| 5  | Chips | Stress    | Liking after eating | Intercept      | 71.18 | 8.74  | 8.14 | 0.39           | <0.0001           |
| 6  |       |           |                     | Virtual liking | 0.60  | 0.14  | 4.18 |                | <b>&lt;0.001</b>  |
| 7  |       | Rest      | Liking after eating | Intercept      | 68.90 | 8.47  | 8.13 | 0.44           | <0.0001           |
| 8  |       |           |                     | Virtual liking | 0.64  | 0.14  | 4.62 |                | <b>&lt;0.0001</b> |
| 9  | Oreos | Stress    | Liking after eating | Intercept      | 75.96 | 13.79 | 5.51 | 0.02           | <0.0001           |
| 10 |       |           |                     | Virtual liking | 0.16  | 0.21  | 0.74 |                | 0.47              |
| 11 |       | Rest      | Liking after eating | Intercept      | 72.57 | 12.68 | 5.72 | 0.05           | <0.0001           |
| 12 |       |           |                     | Virtual liking | 0.24  | 0.19  | 1.22 |                | 0.23              |

<sup>1</sup> Table of statistics for Pearson linear regressions of liking after eating in the laboratory, under either the stress or rest condition, from virtual liking, collected during screening. Values are for each parameter (intercept or virtual liking slope). P-values were held to Bonferroni correction ( $k = 6$ ,  $P \leq 0.008$  are significant and **bolded**).  $N = 29$ . SEM, standard error of the mean, MS, mean square.

**Supplemental Table 5** – Regressions of virtual portion size created from virtual liking at screening<sup>1</sup>

|    | Virtual food    | Dependent        | Parameter      | Value   | SEM    | T     | R <sup>2</sup> | P                 |
|----|-----------------|------------------|----------------|---------|--------|-------|----------------|-------------------|
| 1  | Chips           | Typical          | Intercept      | 6.86    | 20.53  | 0.33  | 0.30           | 0.74              |
| 2  |                 |                  | Virtual liking | 1.15    | 0.34   | 3.40  |                | <b>0.002</b>      |
| 3  | Apples          | Typical          | Intercept      | 80.84   | 86.21  | 0.94  | 0.07           | 0.36              |
| 4  |                 |                  | Virtual liking | 1.61    | 1.16   | 1.38  |                | 0.18              |
| 5  | Olives          | Typical          | Intercept      | -23.85  | 25.56  | -0.93 | 0.46           | 0.36              |
| 6  |                 |                  | Virtual liking | 2.50    | 0.52   | 4.77  |                | <b>&lt;0.0001</b> |
| 7  | Chocolate       | Typical          | Intercept      | -102.05 | 67.39  | -1.51 | 0.31           | 0.14              |
| 8  |                 |                  | Virtual liking | 3.62    | 1.05   | 3.46  |                | <b>0.002</b>      |
| 9  | Pretzels        | Typical          | Intercept      | -12.10  | 18.09  | -0.67 | 0.29           | 0.51              |
| 10 |                 |                  | Virtual liking | 1.02    | 0.31   | 3.33  |                | <b>0.003</b>      |
| 11 | Caramel Popcorn | Typical          | Intercept      | -161.34 | 146.16 | -1.10 | 0.28           | 0.28              |
| 12 |                 |                  | Virtual liking | 7.72    | 2.38   | 3.25  |                | <b>0.003</b>      |
| 13 | Chips           | Recalled stress  | Intercept      | 9.91    | 27.92  | 0.36  | 0.16           | 0.73              |
| 14 |                 |                  | Virtual liking | 1.05    | 0.46   | 2.28  |                | 0.03              |
| 15 | Apples          | Recalled stress  | Intercept      | 5.12    | 147.23 | 0.03  | 0.05           | 0.97              |
| 16 |                 |                  | Virtual liking | 2.25    | 1.98   | 1.13  |                | 0.27              |
| 17 | Olives          | Recalled stress  | Intercept      | -19.38  | 30.68  | -0.63 | 0.35           | 0.53              |
| 18 |                 |                  | Virtual liking | 2.43    | 0.63   | 3.85  |                | <b>0.001</b>      |
| 19 | Chocolate       | Recalled stress  | Intercept      | 24.24   | 86.95  | 0.28  | 0.07           | 0.78              |
| 20 |                 |                  | Virtual liking | 1.96    | 1.35   | 1.45  |                | 0.16              |
| 21 | Pretzels        | Recalled stress  | Intercept      | 3.04    | 33.84  | 0.09  | 0.09           | 0.93              |
| 22 |                 |                  | Virtual liking | 0.90    | 0.57   | 1.58  |                | 0.12              |
| 23 | Caramel Popcorn | Recalled stress  | Intercept      | 78.64   | 174.96 | 0.45  | 0.06           | 0.66              |
| 24 |                 |                  | Virtual liking | 3.82    | 2.85   | 1.34  |                | 0.19              |
| 25 | Chips           | Momentary stress | Intercept      | 5.94    | 18.08  | 0.33  | 0.26           | 0.75              |
| 26 |                 |                  | Virtual liking | 0.92    | 0.30   | 3.09  |                | <b>0.005</b>      |
| 27 | Apples          | Momentary stress | Intercept      | 56.78   | 92.62  | 0.61  | 0.03           | 0.55              |
| 28 |                 |                  | Virtual liking | 1.17    | 1.25   | 0.94  |                | 0.36              |
| 29 | Olives          | Momentary stress | Intercept      | -19.20  | 22.39  | -0.86 | 0.44           | 0.40              |
| 30 |                 |                  | Virtual liking | 2.11    | 0.46   | 4.59  |                | <b>&lt;0.0001</b> |
| 31 | Chocolate       | Momentary stress | Intercept      | -11.33  | 68.98  | -0.16 | 0.10           | 0.87              |
| 32 |                 |                  | Virtual liking | 1.86    | 1.07   | 1.74  |                | 0.09              |
| 33 | Pretzels        | Momentary stress | Intercept      | -20.89  | 14.74  | -1.42 | 0.39           | 0.17              |
| 34 |                 |                  | Virtual liking | 1.02    | 0.25   | 4.12  |                | <b>0.0003</b>     |
| 35 | Caramel Popcorn | Momentary stress | Intercept      | -51.09  | 120.58 | -0.42 | 0.17           | 0.68              |
| 36 |                 |                  | Virtual liking | 4.56    | 1.96   | 2.33  |                | 0.03              |

|    |                 |                |                |        |        |       |      |                   |
|----|-----------------|----------------|----------------|--------|--------|-------|------|-------------------|
| 37 | Chips           | Momentary rest | Intercept      | -10.74 | 19.68  | -0.55 | 0.31 | 0.59              |
| 38 |                 |                | Virtual liking | 1.13   | 0.32   | 3.51  |      | <b>0.002</b>      |
| 39 | Apples          | Momentary rest | Intercept      | 93.78  | 129.10 | 0.73  | 0.02 | 0.47              |
| 40 |                 |                | Virtual liking | 1.25   | 1.74   | 0.72  |      | 0.48              |
| 41 | Olives          | Momentary rest | Intercept      | -27.95 | 26.46  | -1.06 | 0.45 | 0.30              |
| 42 |                 |                | Virtual liking | 2.54   | 0.54   | 4.68  |      | <b>&lt;0.0001</b> |
| 43 | Chocolate       | Momentary rest | Intercept      | -51.85 | 61.89  | -0.84 | 0.19 | 0.41              |
| 44 |                 |                | Virtual liking | 2.39   | 0.96   | 2.49  |      | 0.02              |
| 45 | Pretzels        | Momentary rest | Intercept      | -6.06  | 16.03  | -0.38 | 0.25 | 0.71              |
| 46 |                 |                | Virtual liking | 0.82   | 0.27   | 3.02  |      | 0.01              |
| 47 | Caramel Popcorn | Momentary rest | Intercept      | 8.93   | 97.02  | 0.09  | 0.14 | 0.93              |
| 48 |                 |                | Virtual liking | 3.28   | 1.58   | 2.08  |      | 0.05              |

<sup>1</sup> Table of statistics for Pearson linear regressions of liking after eating in the laboratory, under either the stress or rest condition, from virtual liking, collected during screening. Values are for each parameter (intercept or virtual liking slope). P-values were held to Bonferroni correction ( $k = 24$ ,  $P \leq 0.002$  are significant and **bolded**).  $N = 29$ . SEM, standard error of the mean, MS, mean square.

**Supplemental Table 6** – Regressions of virtual portion size created from consumption frequency<sup>1</sup>

|    | <b>Food</b>     | <b>Dependent</b> | <b>Parameter</b> | <b>Value</b> | <b>SEM</b> | <b>T</b> | <b>R<sup>2</sup></b> | <b>P</b> |
|----|-----------------|------------------|------------------|--------------|------------|----------|----------------------|----------|
| 1  | Chips           | Typical          | Intercept        | 56.04        | 8.30       | 6.75     | 0.33                 | <0.0001  |
| 2  |                 |                  | Frequency        | 61.13        | 16.94      | 3.61     |                      |          |
| 3  | Apples          | Typical          | Intercept        | 169.96       | 21.25      | 8.00     | 0.16                 | <0.0001  |
| 4  |                 |                  | Frequency        | 70.50        | 31.23      | 2.26     |                      |          |
| 5  | Olives          | Typical          | Intercept        | 21.76        | 12.86      | 1.69     | 0.75                 | 0.10     |
| 6  |                 |                  | Frequency        | 556.06       | 61.38      | 9.06     |                      |          |
| 7  | Chocolate       | Typical          | Intercept        | 95.80        | 25.86      | 3.70     | 0.10                 | 0.001    |
| 8  |                 |                  | Frequency        | 239.90       | 139.03     | 1.73     |                      |          |
| 9  | Pretzels        | Typical          | Intercept        | 38.04        | 7.92       | 4.80     | 0.08                 | <0.0001  |
| 10 |                 |                  | Frequency        | 85.92        | 57.80      | 1.49     |                      |          |
| 11 | Caramel Popcorn | Typical          | Intercept        | 242.86       | 62.12      | 3.91     | 0.08                 | 0.0006   |
| 12 |                 |                  | Frequency        | 1315.77      | 868.93     | 1.51     |                      |          |
| 13 | Chips           | Recalled stress  | Intercept        | 61.21        | 12.20      | 5.02     | 0.06                 | <0.0001  |
| 14 |                 |                  | Frequency        | 31.28        | 24.90      | 1.26     |                      |          |
| 15 | Apples          | Recalled stress  | Intercept        | 136.32       | 37.64      | 3.62     | 0.07                 | 0.001    |
| 16 |                 |                  | Frequency        | 81.74        | 55.32      | 1.48     |                      |          |
| 17 | Olives          | Recalled stress  | Intercept        | 28.47        | 20.42      | 1.39     | 0.49                 | 0.17     |
| 18 |                 |                  | Frequency        | 491.59       | 97.44      | 5.05     |                      |          |
| 19 | Chocolate       | Recalled stress  | Intercept        | 118.17       | 29.04      | 4.07     | 0.09                 | 0.0004   |
| 20 |                 |                  | Frequency        | 250.14       | 156.14     | 1.60     |                      |          |
| 21 | Pretzels        | Recalled stress  | Intercept        | 43.40        | 13.15      | 3.30     | 0.06                 | 0.003    |
| 22 |                 |                  | Frequency        | 127.93       | 95.91      | 1.33     |                      |          |
| 23 | Caramel Popcorn | Recalled stress  | Intercept        | 265.44       | 66.27      | 4.01     | 0.05                 | 0.0004   |
| 24 |                 |                  | Frequency        | 1056.58      | 926.92     | 1.14     |                      |          |
| 25 | Chips           | Momentary stress | Intercept        | 45.07        | 7.28       | 6.19     | 0.29                 | <0.0001  |
| 26 |                 |                  | Frequency        | 49.64        | 14.87      | 3.34     |                      |          |
| 27 | Apples          | Momentary stress | Intercept        | 119.80       | 23.31      | 5.14     | 0.09                 | <0.0001  |
| 28 |                 |                  | Frequency        | 56.08        | 34.26      | 1.64     |                      |          |
| 29 | Olives          | Momentary stress | Intercept        | 19.93        | 12.34      | 1.62     | 0.69                 | 0.12     |
| 30 |                 |                  | Frequency        | 459.24       | 58.87      | 7.80     |                      |          |
| 31 | Chocolate       | Momentary stress | Intercept        | 89.11        | 23.99      | 3.71     | 0.04                 | <0.001   |
| 32 |                 |                  | Frequency        | 137.25       | 128.98     | 1.06     |                      |          |
| 33 | Pretzels        | Momentary stress | Intercept        | 22.80        | 5.68       | 4.01     | 0.38                 | <0.001   |
| 34 |                 |                  | Frequency        | 168.54       | 41.44      | 4.07     |                      |          |
| 35 | Caramel Popcorn | Momentary stress | Intercept        | 209.71       | 49.57      | 4.23     | <0.001               | <0.001   |
| 36 |                 |                  | Frequency        | 108.19       | 693.38     | 0.16     |                      |          |

|    |                 |                |           |         |        |       |        |                   |
|----|-----------------|----------------|-----------|---------|--------|-------|--------|-------------------|
| 37 | Chips           | Momentary rest | Intercept | 42.63   | 8.91   | 4.78  | 0.17   | <0.0001           |
| 38 |                 |                | Frequency | 42.55   | 18.20  | 2.34  |        | 0.03              |
| 39 | Apples          | Momentary rest | Intercept | 181.65  | 33.83  | 5.37  | <0.001 | <0.0001           |
| 40 |                 |                | Frequency | 6.77    | 49.72  | 0.14  |        | 0.89              |
| 41 | Olives          | Momentary rest | Intercept | 16.80   | 12.08  | 1.39  | 0.79   | 0.18              |
| 42 |                 |                | Frequency | 585.79  | 57.64  | 10.16 |        | <b>&lt;0.0001</b> |
| 43 | Chocolate       | Momentary rest | Intercept | 84.38   | 22.77  | 3.71  | 0.03   | 0.001             |
| 44 |                 |                | Frequency | 110.14  | 122.40 | 0.90  |        | 0.38              |
| 45 | Pretzels        | Momentary rest | Intercept | 31.29   | 6.55   | 4.78  | 0.15   | <0.0001           |
| 46 |                 |                | Frequency | 104.99  | 47.79  | 2.20  |        | 0.04              |
| 47 | Caramel Popcorn | Momentary rest | Intercept | 204.66  | 39.17  | 5.22  | <0.01  | <0.0001           |
| 48 |                 |                | Frequency | -164.20 | 547.89 | -0.30 |        | 0.77              |

<sup>1</sup> Table of statistics for Pearson linear regressions of virtual portion size created for each context (typical, recalled stress, momentary rest, and momentary stress) from consumption frequency (times per day). Values are for each parameter (intercept or frequency slope). P-values were held to Bonferroni correction ( $k = 24$ ,  $P \leq 0.002$  are significant and **bolded**).  $N = 29$ . SEM, standard error of the mean, MS, mean square.



**Supplemental Table 7**– Regressions of intake from liking and frequency<sup>1</sup>

|    | Snack | Condition | Dependent | Parameter           | Value  | SEM   | T     | R <sup>2</sup> | P            |
|----|-------|-----------|-----------|---------------------|--------|-------|-------|----------------|--------------|
| 1  | M&Ms  | Stress    | Intake    | Intercept           | 14.08  | 8.64  | 1.63  | 0.01           | 0.12         |
| 2  |       |           |           | Virtual liking      | 0.11   | 0.19  | 0.60  |                | 0.56         |
| 3  |       |           |           | Intercept           | 19.49  | 3.57  | 5.45  | <0.01          | <0.0001      |
| 4  |       |           |           | Frequency           | 0.01   | 0.39  | 0.03  |                | 0.98         |
| 5  |       |           |           | Intercept           | -0.60  | 10.53 | -0.06 | 0.13           | 0.96         |
| 6  |       |           |           | Liking after eating | 0.21   | 0.11  | 2.01  |                | 0.06         |
| 7  |       | Rest      | Intake    | Intercept           | 18.24  | 7.55  | 2.41  | 0.002          | 0.02         |
| 8  |       |           |           | Virtual liking      | -0.03  | 0.16  | -0.21 |                | 0.84         |
| 9  |       |           |           | Intercept           | 18.54  | 3.13  | 5.92  | 0.03           | <0.0001      |
| 10 |       |           |           | Frequency           | -0.33  | 0.35  | -0.97 |                | 0.34         |
| 11 |       |           |           | Intercept           | -2.54  | 10.68 | -0.24 | 0.13           | 0.81         |
| 12 |       |           |           | Liking after eating | 0.21   | 0.11  | 1.97  |                | 0.06         |
| 13 | Chips | Stress    | Intake    | Intercept           | 7.39   | 8.81  | 0.84  | 0.08           | 0.41         |
| 14 |       |           |           | Virtual liking      | 0.22   | 0.14  | 1.54  |                | 0.13         |
| 15 |       |           |           | Intercept           | 15.06  | 3.33  | 4.52  | 0.22           | 0.0001       |
| 16 |       |           |           | Frequency           | 0.05   | 0.02  | 2.79  |                | 0.01         |
| 17 |       |           |           | Intercept           | -23.37 | 14.63 | -1.60 | 0.25           | 0.12         |
| 18 |       |           |           | Liking after eating | 0.41   | 0.14  | 3.03  |                | 0.01         |
| 19 |       | Rest      | Intake    | Intercept           | 10.43  | 8.90  | 1.17  | 0.05           | 0.25         |
| 20 |       |           |           | Virtual liking      | 0.17   | 0.15  | 1.17  |                | 0.25         |
| 21 |       |           |           | Intercept           | 14.78  | 3.23  | 4.57  | 0.26           | <0.0001      |
| 22 |       |           |           | Frequency           | 0.06   | 0.02  | 3.07  |                | <b>0.005</b> |
| 23 |       |           |           | Intercept           | 2.93   | 16.32 | 0.18  | 0.04           | 0.86         |
| 24 |       |           |           | Liking after eating | 0.16   | 0.15  | 1.08  |                | 0.29         |
| 25 | Oreos | Stress    | Intake    | Intercept           | 15.11  | 14.31 | 1.06  | 0.03           | 0.30         |
| 26 |       |           |           | Virtual liking      | 0.20   | 0.22  | 0.91  |                | 0.37         |
| 27 |       |           |           | Intercept           | 25.53  | 6.91  | 3.69  | 0.004          | 0.001        |
| 28 |       |           |           | Frequency           | 0.05   | 0.15  | 0.34  |                | 0.74         |
| 29 |       |           |           | Intercept           | -12.11 | 15.53 | -0.78 | 0.20           | 0.44         |
| 30 |       |           |           | Liking after eating | 0.45   | 0.17  | 2.64  |                | 0.01         |
| 31 |       | Rest      | Intake    | Intercept           | 14.71  | 16.23 | 0.91  | 0.03           | 0.37         |
| 32 |       |           |           | Virtual liking      | 0.23   | 0.25  | 0.93  |                | 0.36         |
| 33 |       |           |           | Intercept           | 28.82  | 7.92  | 3.64  | <0.01          | 0.001        |
| 34 |       |           |           | Virtual liking      | -0.02  | 0.17  | -0.11 |                | 0.91         |
| 35 |       |           |           | Intercept           | -12.42 | 19.95 | -0.62 | 0.14           | 0.54         |
| 36 |       |           |           | Liking after eating | 0.46   | 0.22  | 2.11  |                | 0.04         |

<sup>1</sup> Table of statistics for Pearson linear regressions of stress and rest intake of all three snacks (M&Ms, chips, and Oreos) from virtual liking (VAS, 0-100mm), collected at screening, liking after eating (0-15 ordinal scale), and consumption frequency (times per day). Regressions were done separately for each of these variables. Values are for each parameter (intercept or slope for virtual liking, frequency, or liking after eating). P-values were held to Bonferroni correction for prediction for each snack ( $k = 6$ ,  $P \leq 0.008$  are significant and **bolded**).  $N = 29$ . SEM, standard error of the mean, MS, mean square.

**Supplemental Table 8** – Linear regressions of intakes from portion-by-frequency interactions<sup>1</sup>

|    | <b>Dependent</b>     | <b>Parameter</b>            | <b>Virtual food</b> | <b>Value</b> | <b>SEM</b> | <b>T</b> | <b>R<sup>2</sup></b> | <b>P</b> |
|----|----------------------|-----------------------------|---------------------|--------------|------------|----------|----------------------|----------|
| 1  | Rest intake (M&Ms)   | Intercept                   |                     | 18.96        | 3.27       | 5.80     | 0.03                 | <0.0001  |
| 2  |                      | Typical x Frequency         | Chips               | -0.04        | 0.04       | -0.98    |                      | 0.33     |
| 3  | Rest intake (M&Ms)   | Intercept                   |                     | 15.98        | 3.30       | 4.85     | 0.05                 | <0.0001  |
| 4  |                      | Typical x Frequency         | Apples              | 0.02         | 0.01       | 1.21     |                      | 0.24     |
| 5  | Rest intake (M&Ms)   | Intercept                   |                     | 17.85        | 3.13       | 5.69     | <0.01                | <0.0001  |
| 6  |                      | Typical x Frequency         | Olives              | -0.01        | 0.03       | -0.23    |                      | 0.82     |
| 7  | Rest intake (M&Ms)   | Intercept                   |                     | 17.34        | 3.44       | 5.05     | <0.01                | <0.0001  |
| 8  |                      | Typical x Frequency         | Chocolate           | 0.02         | 0.08       | 0.22     |                      | 0.83     |
| 9  | Rest intake (M&Ms)   | Intercept                   |                     | 19.52        | 3.66       | 5.33     | 0.03                 | <0.0001  |
| 10 |                      | Typical x Frequency         | Pretzels            | -0.38        | 0.43       | -0.88    |                      | 0.39     |
| 11 | Rest intake (M&Ms)   | Intercept                   |                     | 16.36        | 3.21       | 5.10     | 0.05                 | <0.0001  |
| 12 |                      | Typical x Frequency         | Caramel Popcorn     | 0.09         | 0.08       | 1.13     |                      | 0.27     |
| 13 | Stress intake (M&Ms) | Intercept                   |                     | 21.52        | 3.65       | 5.89     | 0.06                 | <0.0001  |
| 14 |                      | Recalled stress x Frequency | Chips               | -0.08        | 0.06       | -1.32    |                      | 0.20     |
| 15 | Stress intake (M&Ms) | Intercept                   |                     | 19.74        | 3.72       | 5.31     | <0.01                | <0.0001  |
| 16 |                      | Recalled stress x Frequency | Apples              | <0.01        | 0.02       | -0.15    |                      | 0.88     |
| 17 | Stress intake (M&Ms) | Intercept                   |                     | 20.06        | 3.49       | 5.74     | 0.02                 | <0.0001  |
| 18 |                      | Recalled stress x Frequency | Olives              | -0.02        | 0.03       | -0.68    |                      | 0.50     |
| 19 | Stress intake (M&Ms) | Intercept                   |                     | 19.09        | 3.71       | 5.15     | <0.01                | <0.0001  |
| 20 |                      | Recalled stress x Frequency | Chocolate           | 0.02         | 0.07       | 0.30     |                      | 0.77     |
| 21 | Stress intake (M&Ms) | Intercept                   |                     | 22.13        | 3.82       | 5.79     | 0.07                 | <0.0001  |
| 22 |                      | Recalled stress x Frequency | Pretzels            | -0.43        | 0.31       | -1.38    |                      | 0.18     |
| 23 | Stress intake (M&Ms) | Intercept                   |                     | 18.18        | 3.63       | 5.00     | 0.03                 | <0.0001  |
| 24 |                      | Recalled stress x Frequency | Caramel Popcorn     | 0.09         | 0.10       | 0.98     |                      | 0.33     |

|    |                      |                              |                 |       |      |       |       |         |
|----|----------------------|------------------------------|-----------------|-------|------|-------|-------|---------|
| 25 | Rest intake (M&Ms)   | Intercept                    |                 | 18.55 | 3.25 | 5.70  | 0.02  | <0.0001 |
| 26 |                      | Momentary rest x Frequency   | Chips           | -0.04 | 0.05 | -0.72 |       | 0.47    |
| 27 | Rest intake (M&Ms)   | Intercept                    |                 | 15.55 | 3.64 | 4.28  | 0.04  | <0.01   |
| 28 |                      | Momentary rest x Frequency   | Apples          | 0.03  | 0.03 | 1.04  |       | 0.31    |
| 29 | Rest intake (M&Ms)   | Intercept                    |                 | 17.82 | 3.14 | 5.68  | <0.01 | <0.0001 |
| 30 |                      | Momentary rest x Frequency   | Olives          | <0.01 | 0.03 | -0.18 |       | 0.86    |
| 31 | Rest intake (M&Ms)   | Intercept                    |                 | 15.62 | 3.18 | 4.91  | 0.09  | <0.0001 |
| 32 |                      | Momentary rest x Frequency   | Chocolate       | 0.16  | 0.10 | 1.63  |       | 0.11    |
| 33 | Rest intake (M&Ms)   | Intercept                    |                 | 18.98 | 3.64 | 5.21  | 0.02  | <0.0001 |
| 34 |                      | Momentary rest x Frequency   | Pretzels        | -0.28 | 0.44 | -0.64 |       | 0.53    |
| 35 | Rest intake (M&Ms)   | Intercept                    |                 | 15.80 | 3.44 | 4.60  | 0.04  | <0.0001 |
| 36 |                      | Momentary rest x Frequency   | Caramel Popcorn | 0.32  | 0.29 | 1.11  |       | 0.27    |
| 37 | Stress intake (M&Ms) | Intercept                    |                 | 21.04 | 3.68 | 5.72  | 0.04  | <0.0001 |
| 38 |                      | Momentary stress x Frequency | Chips           | -0.06 | 0.06 | -1.03 |       | 0.31    |
| 39 | Stress intake (M&Ms) | Intercept                    |                 | 19.78 | 3.94 | 5.03  | <0.01 | <0.0001 |
| 40 |                      | Momentary stress x Frequency | Apples          | <0.01 | 0.03 | -0.14 |       | 0.89    |
| 41 | Stress intake (M&Ms) | Intercept                    |                 | 20.14 | 3.51 | 5.74  | 0.02  | <0.0001 |
| 42 |                      | Momentary stress x Frequency | Olives          | -0.03 | 0.04 | -0.72 |       | 0.48    |
| 43 | Stress intake (M&Ms) | Intercept                    |                 | 16.98 | 3.64 | 4.67  | 0.09  | <0.0001 |
| 44 |                      | Momentary stress x Frequency | Chocolate       | 0.17  | 0.11 | 1.60  |       | 0.12    |
| 45 | Stress intake (M&Ms) | Intercept                    |                 | 21.26 | 3.60 | 5.90  | 0.06  | <0.0001 |
| 46 |                      | Momentary stress x Frequency | Pretzels        | -0.34 | 0.27 | -1.27 |       | 0.22    |
| 47 | Stress intake (M&Ms) | Intercept                    |                 | 19.78 | 3.77 | 5.24  | <0.01 | <0.0001 |
| 48 |                      | Momentary stress x Frequency | Caramel Popcorn | -0.03 | 0.21 | -0.16 |       | 0.87    |

|    |                       |                             |                 |       |      |       |       |                   |
|----|-----------------------|-----------------------------|-----------------|-------|------|-------|-------|-------------------|
| 49 | Rest intake (chips)   | Intercept                   |                 | 15.94 | 2.71 | 5.89  | 0.37  | <0.0001           |
| 50 |                       | Typical x Frequency         | Chips           | 0.14  | 0.04 | 4.01  |       | <b>0.0004</b>     |
| 51 | Rest intake (chips)   | Intercept                   |                 | 20.17 | 3.48 | 5.80  | <0.01 | <0.0001           |
| 52 |                       | Typical x Frequency         | Apples          | <0.01 | 0.02 | 0.05  |       | 0.96              |
| 53 | Rest intake (chips)   | Intercept                   |                 | 17.59 | 2.28 | 7.72  | 0.50  | <0.0001           |
| 54 |                       | Typical x Frequency         | Olives          | 0.10  | 0.02 | 5.20  |       | <b>&lt;0.0001</b> |
| 55 | Rest intake (chips)   | Intercept                   |                 | 20.87 | 3.52 | 5.92  | 0.01  | <0.0001           |
| 56 |                       | Typical x Frequency         | Chocolate       | -0.03 | 0.09 | -0.39 |       | 0.70              |
| 57 | Rest intake (chips)   | Intercept                   |                 | 18.55 | 3.77 | 4.92  | 0.02  | <0.0001           |
| 58 |                       | Typical x Frequency         | Pretzels        | 0.35  | 0.45 | 0.79  |       | 0.44              |
| 59 | Rest intake (chips)   | Intercept                   |                 | 18.10 | 3.18 | 5.70  | 0.11  | <0.0001           |
| 60 |                       | Typical x Frequency         | Caramel Popcorn | 0.15  | 0.08 | 1.85  |       | 0.08              |
| 61 | Stress intake (chips) | Intercept                   |                 | 16.27 | 2.97 | 5.48  | 0.27  | <0.0001           |
| 62 |                       | Recalled stress x Frequency | Chips           | 0.16  | 0.05 | 3.17  |       | 0.004             |
| 63 | Stress intake (chips) | Intercept                   |                 | 20.11 | 3.43 | 5.87  | <0.01 | <0.0001           |
| 64 |                       | Recalled stress x Frequency | Apples          | <0.01 | 0.01 | 0.05  |       | 0.96              |
| 65 | Stress intake (chips) | Intercept                   |                 | 17.60 | 2.43 | 7.25  | 0.44  | <0.0001           |
| 66 |                       | Recalled stress x Frequency | Olives          | 0.11  | 0.02 | 4.63  |       | <b>&lt;0.0001</b> |
| 67 | Stress intake (chips) | Intercept                   |                 | 21.05 | 3.40 | 6.19  | 0.02  | <0.0001           |
| 68 |                       | Recalled stress x Frequency | Chocolate       | -0.04 | 0.06 | -0.67 |       | 0.51              |
| 69 | Stress intake (chips) | Intercept                   |                 | 20.31 | 3.64 | 5.58  | <0.01 | <0.0001           |
| 70 |                       | Recalled stress x Frequency | Pretzels        | -0.02 | 0.30 | -0.08 |       | 0.94              |
| 71 | Stress intake (chips) | Intercept                   |                 | 18.34 | 3.28 | 5.60  | 0.08  | <0.0001           |
| 72 |                       | Recalled stress x Frequency | Caramel Popcorn | 0.13  | 0.09 | 1.49  |       | 0.15              |

|    |                       |                              |                 |       |      |       |       |                   |
|----|-----------------------|------------------------------|-----------------|-------|------|-------|-------|-------------------|
| 73 | Rest intake (chips)   | Intercept                    |                 | 15.95 | 2.50 | 6.37  | 0.45  | <0.0001           |
| 74 |                       | Momentary rest x Frequency   | Chips           | 0.20  | 0.04 | 4.69  |       | <b>&lt;0.0001</b> |
| 75 | Rest intake (chips)   | Intercept                    |                 | 19.51 | 3.80 | 5.13  | <0.01 | <0.0001           |
| 76 |                       | Momentary rest x Frequency   | Apples          | 0.01  | 0.03 | 0.34  |       | 0.74              |
| 77 | Rest intake (chips)   | Intercept                    |                 | 17.56 | 2.32 | 7.57  | 0.48  | <0.0001           |
| 78 |                       | Momentary rest x Frequency   | Olives          | 0.10  | 0.02 | 5.02  |       | <b>&lt;0.0001</b> |
| 79 | Rest intake (chips)   | Intercept                    |                 | 19.81 | 3.42 | 5.80  | <0.01 | <0.0001           |
| 80 |                       | Momentary rest x Frequency   | Chocolate       | 0.03  | 0.10 | 0.32  |       | 0.76              |
| 81 | Rest intake (chips)   | Intercept                    |                 | 20.28 | 3.77 | 5.38  | <0.01 | <0.0001           |
| 82 |                       | Momentary rest x Frequency   | Pretzels        | -0.01 | 0.45 | -0.02 |       | 0.98              |
| 83 | Rest intake (chips)   | Intercept                    |                 | 17.98 | 3.50 | 5.14  | 0.06  | <0.0001           |
| 84 |                       | Momentary rest x Frequency   | Caramel Popcorn | 0.38  | 0.29 | 1.31  |       | 0.20              |
| 85 | Stress intake (chips) | Intercept                    |                 | 15.79 | 2.74 | 5.75  | 0.37  | <0.0001           |
| 86 |                       | Momentary stress x Frequency | Chips           | 0.18  | 0.05 | 3.97  |       | <b>0.0005</b>     |
| 87 | Stress intake (chips) | Intercept                    |                 | 19.86 | 3.63 | 5.47  | <0.01 | <0.0001           |
| 88 |                       | Momentary stress x Frequency | Apples          | <0.01 | 0.02 | 0.18  |       | 0.86              |
| 89 | Stress intake (chips) | Intercept                    |                 | 17.52 | 2.52 | 6.97  | 0.41  | <0.0001           |
| 90 |                       | Momentary stress x Frequency | Olives          | 0.12  | 0.03 | 4.29  |       | <b>0.0002</b>     |
| 91 | Stress intake (chips) | Intercept                    |                 | 20.86 | 3.50 | 5.96  | 0.01  | <0.0001           |
| 92 |                       | Momentary stress x Frequency | Chocolate       | -0.05 | 0.10 | -0.45 |       | 0.66              |
| 93 | Stress intake (chips) | Intercept                    |                 | 19.78 | 3.41 | 5.79  | <0.01 | <0.0001           |
| 94 |                       | Momentary stress x Frequency | Pretzels        | 0.08  | 0.26 | 0.30  |       | 0.77              |
| 95 | Stress intake (chips) | Intercept                    |                 | 20.19 | 3.48 | 5.80  | <0.01 | <0.0001           |
| 96 |                       | Momentary stress x Frequency | Caramel Popcorn | <0.01 | 0.19 | -0.01 |       | 0.99              |

|     |                       |                             |                 |       |      |       |       |         |
|-----|-----------------------|-----------------------------|-----------------|-------|------|-------|-------|---------|
| 97  | Rest intake (Oreos)   | Intercept                   |                 | 31.00 | 5.94 | 5.22  | 0.05  | <0.0001 |
| 98  |                       | Typical x Frequency         | Chips           | -0.09 | 0.08 | -1.19 |       | 0.25    |
| 99  | Rest intake (Oreos)   | Intercept                   |                 | 25.91 | 6.11 | 4.24  | 0.03  | <0.01   |
| 100 |                       | Typical x Frequency         | Apples          | 0.02  | 0.03 | 0.88  |       | 0.39    |
| 101 | Rest intake (Oreos)   | Intercept                   |                 | 28.84 | 5.72 | 5.05  | 0.01  | <0.0001 |
| 102 |                       | Typical x Frequency         | Olives          | -0.02 | 0.05 | -0.50 |       | 0.62    |
| 103 | Rest intake (Oreos)   | Intercept                   |                 | 24.05 | 6.05 | 3.98  | 0.08  | <0.01   |
| 104 |                       | Typical x Frequency         | Chocolate       | 0.22  | 0.15 | 1.50  |       | 0.15    |
| 105 | Rest intake (Oreos)   | Intercept                   |                 | 27.80 | 6.80 | 4.09  | <0.01 | <0.01   |
| 106 |                       | Typical x Frequency         | Pretzels        | 0.08  | 0.80 | 0.11  |       | 0.92    |
| 107 | Rest intake (Oreos)   | Intercept                   |                 | 25.06 | 5.78 | 4.34  | 0.08  | <0.01   |
| 108 |                       | Typical x Frequency         | Caramel Popcorn | 0.21  | 0.14 | 1.49  |       | 0.15    |
| 109 | Stress intake (Oreos) | Intercept                   |                 | 30.82 | 5.11 | 6.03  | 0.10  | <0.0001 |
| 110 |                       | Recalled stress x Frequency | Chips           | -0.15 | 0.09 | -1.70 |       | 0.10    |
| 111 | Stress intake (Oreos) | Intercept                   |                 | 24.22 | 5.08 | 4.76  | 0.08  | <0.0001 |
| 112 |                       | Recalled stress x Frequency | Apples          | 0.03  | 0.02 | 1.53  |       | 0.14    |
| 113 | Stress intake (Oreos) | Intercept                   |                 | 27.94 | 4.99 | 5.60  | 0.02  | <0.0001 |
| 114 |                       | Recalled stress x Frequency | Olives          | -0.03 | 0.05 | -0.64 |       | 0.53    |
| 115 | Stress intake (Oreos) | Intercept                   |                 | 26.41 | 5.28 | 5.00  | 0.01  | <0.0001 |
| 116 |                       | Recalled stress x Frequency | Chocolate       | 0.04  | 0.09 | 0.39  |       | 0.70    |
| 117 | Stress intake (Oreos) | Intercept                   |                 | 29.04 | 5.59 | 5.19  | 0.02  | <0.0001 |
| 118 |                       | Recalled stress x Frequency | Pretzels        | -0.30 | 0.46 | -0.66 |       | 0.51    |
| 119 | Stress intake (Oreos) | Intercept                   |                 | 24.26 | 5.05 | 4.80  | 0.08  | <0.0001 |
| 120 |                       | Recalled stress x Frequency | Caramel Popcorn | 0.21  | 0.13 | 1.56  |       | 0.13    |

|     |                       |                              |                 |       |      |       |       |         |
|-----|-----------------------|------------------------------|-----------------|-------|------|-------|-------|---------|
| 121 | Rest intake (Oreos)   | Intercept                    |                 | 29.69 | 5.96 | 4.98  | 0.02  | <0.0001 |
| 122 |                       | Momentary rest x Frequency   | Chips           | -0.07 | 0.10 | -0.68 |       | 0.50    |
| 123 | Rest intake (Oreos)   | Intercept                    |                 | 25.21 | 6.71 | 3.76  | 0.02  | <0.01   |
| 124 |                       | Momentary rest x Frequency   | Apples          | 0.04  | 0.05 | 0.79  |       | 0.44    |
| 125 | Rest intake (Oreos)   | Intercept                    |                 | 28.85 | 5.72 | 5.04  | 0.01  | <0.0001 |
| 126 |                       | Momentary rest x Frequency   | Olives          | -0.02 | 0.05 | -0.49 |       | 0.63    |
| 127 | Rest intake (Oreos)   | Intercept                    |                 | 22.79 | 5.51 | 4.14  | 0.18  | <0.01   |
| 128 |                       | Momentary rest x Frequency   | Chocolate       | 0.41  | 0.17 | 2.47  |       | 0.02    |
| 129 | Rest intake (Oreos)   | Intercept                    |                 | 28.60 | 6.71 | 4.26  | <0.01 | <0.01   |
| 130 |                       | Momentary rest x Frequency   | Pretzels        | -0.08 | 0.81 | -0.11 |       | 0.92    |
| 131 | Rest intake (Oreos)   | Intercept                    |                 | 23.73 | 6.19 | 3.83  | 0.07  | <0.01   |
| 132 |                       | Momentary rest x Frequency   | Caramel Popcorn | 0.76  | 0.52 | 1.47  |       | 0.15    |
| 133 | Stress intake (Oreos) | Intercept                    |                 | 30.19 | 5.15 | 5.86  | 0.07  | <0.0001 |
| 134 |                       | Momentary stress x Frequency | Chips           | -0.12 | 0.09 | -1.44 |       | 0.16    |
| 135 | Stress intake (Oreos) | Intercept                    |                 | 21.51 | 5.15 | 4.17  | 0.16  | <0.01   |
| 136 |                       | Momentary stress x Frequency | Apples          | 0.08  | 0.03 | 2.25  |       | 0.03    |
| 137 | Stress intake (Oreos) | Intercept                    |                 | 27.68 | 5.03 | 5.50  | 0.01  | <0.0001 |
| 138 |                       | Momentary stress x Frequency | Olives          | -0.02 | 0.06 | -0.38 |       | 0.71    |
| 139 | Stress intake (Oreos) | Intercept                    |                 | 21.80 | 4.88 | 4.47  | 0.19  | <0.01   |
| 140 |                       | Momentary stress x Frequency | Chocolate       | 0.37  | 0.15 | 2.55  |       | 0.02    |
| 141 | Stress intake (Oreos) | Intercept                    |                 | 27.31 | 5.29 | 5.16  | <0.01 | <0.0001 |
| 142 |                       | Momentary stress x Frequency | Pretzels        | -0.02 | 0.40 | -0.05 |       | 0.96    |
| 143 | Stress intake (Oreos) | Intercept                    |                 | 24.24 | 5.21 | 4.65  | 0.06  | <0.0001 |
| 144 |                       | Momentary stress x Frequency | Caramel Popcorn | 0.40  | 0.29 | 1.36  |       | 0.18    |

<sup>1</sup> Table of statistics for linear regressions of intakes of each snack (M&Ms, chips, and Oreos), under either the stress or rest condition, from portion-by-frequency interactions for each eating context (typical, recalled stress, momentary stress, and momentary rest). Values are for each parameter (intercept or portion x frequency slope). P-values were held to Bonferroni correction ( $k = 72$ ,  $P \leq 0.0007$  are significant and **bolded**).  $N = 29$ . SEM, standard error of the mean, MS, mean square.



## Supplemental Figure 1

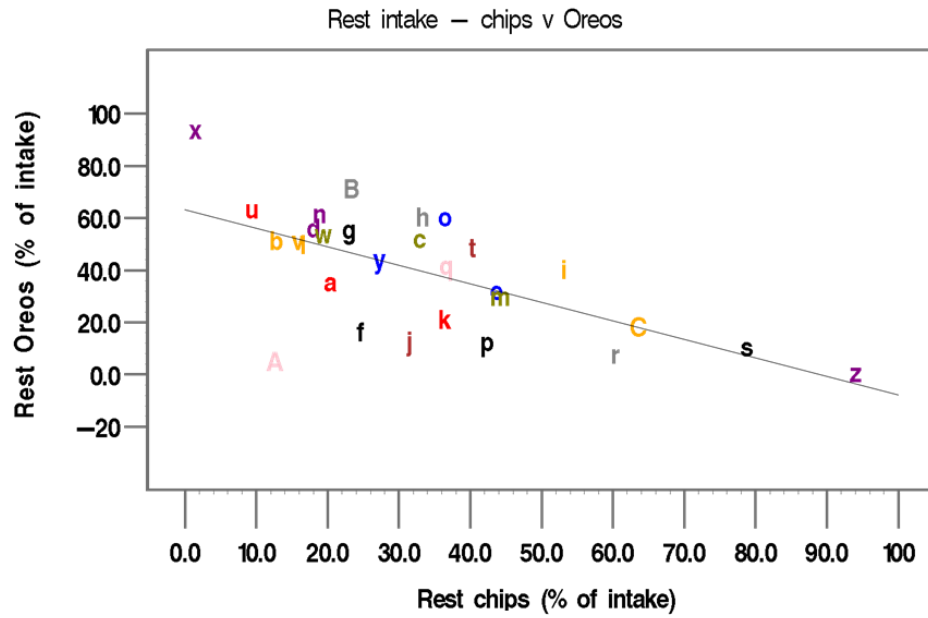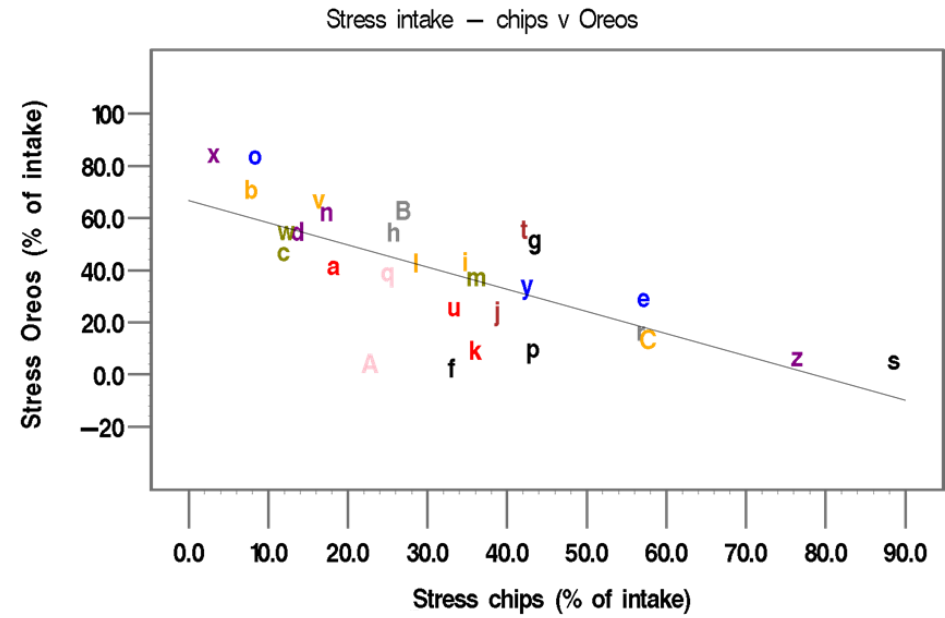

Linear regressions of percent of total intake (g) attributed by Oreo intake from percent of total intake attributed by chip intake at rest (left panel,  $b = -0.71$ , intercept = 63g,  $R^2 = 0.42$ ,  $P = 0.0002$ ) and stress (right panel,  $b = -0.85$ , intercept = 67g,  $R^2 = 0.51$ ,  $P = 0.00001$ ) for all participants ( $N = 29$ ).
